# Supplementary material for: Illness beliefs and the sociocultural context of diabetes self-management in British South Asians: a mixed methods study
Source: PubMed Central journal article supplement (PMC4438635; doi:10.1186/s12875-015-0269-y), 2015-05-10
Supplement: 12875_2015_269_MOESM1_ESM.pdf [file 12875_2015_269_MOESM1_ESM.pdf]

## Additional file

### Appendix 1: Social network characteristics (Vassilev et al, 2013) <sup>[29]</sup>

| Network characteristics                       | Description                                                                                                                                                                                                                    |
|-----------------------------------------------|--------------------------------------------------------------------------------------------------------------------------------------------------------------------------------------------------------------------------------|
| Size of support network                       | A supportive network member was defined as being a member with a non-zero score on any of the work questions.                                                                                                                  |
| Frequency of contact                          | Members in contact at least weekly, including by phone, email or social media.                                                                                                                                                 |
| Number of supportive females                  | Number of supportive females in the network.                                                                                                                                                                                   |
| Proximate number of children                  | Children living in the same home or within a 5 minute walk/drive.                                                                                                                                                              |
| Mix of relationships (members in the network) | Number of different relationship types in the network (out of 10 types: <i>Immediate family, extended family, friend, neighbour, groups, work relationships, medical professionals, and other professionals, pet, other</i> ). |
| Emotional work                                | Assistance with providing comfort when worried or anxious about everyday matters, including health and well-being.                                                                                                             |
| Illness work                                  | Assistance with diet, medications, understanding symptoms, and making appointments.                                                                                                                                            |
